1       **Developmental plasticity of hearing sensitivity in red-eared slider *Trachemys***  
2                                               ***scripta elegans***

3       Jichao Wang<sup>1\*</sup>, Handong Li<sup>1</sup>, Tongliang Wang<sup>1</sup>, Bo Chen<sup>1</sup>, Jianguo Cui<sup>2</sup>, Haitao Shi<sup>1,2</sup>

4                                               \*

5       <sup>1</sup> Ministry of Education Key Laboratory for Ecology of Tropical Islands, College of  
6                                               Life Sciences, Hainan Normal University, Haikou, China

7       <sup>2</sup> Chengdu Institute of Biology, Chinese Academy of Sciences, Chengdu, China

8       \* Author for correspondence (wjc@hainnu.edu.cn; haitao-shi@263.net)

9       **Abstract**

10       Developmental plasticity of hearing sensitivity (DPHS) has been verified in some  
11       groups of vertebrates. Turtles face a trade-off between terrestrial and aquatic hearing  
12       in different acoustic environments throughout ontogeny. However, how chelonian  
13       hearing sensitivity changes throughout ontogeny is still unclear. To verify DPHS in  
14       turtles, auditory brainstem responses (ABR) were compared using hearing thresholds  
15       and latencies in female red-eared slider (*Trachemys scripta elegans*) aged 1 week, 1  
16       month, 1 year, and 5 years, and the results showed hearing sensitivity bandwidths of  
17       approximately 200–1100, 200–1100, 200–1300, and 200–1400 Hz, respectively. The  
18       lowest threshold sensitivity was approximately 600 Hz. Below 600 Hz, ABR  
19       threshold decreased rapidly with increasing age (1 week to 1 year), with significant  
20       differences between age groups, but no significant difference between the 1- and  
21       5-year age groups (stimulus frequency, 200–600 Hz). Above 600 Hz, ABR threshold  
22       was the lowest in the 5-year age group. These findings show that aging was  
23       accompanied by hearing sensitivity changes, suggesting rapid, frequency-segmented  
24       development during ontogeny. This variability in hearing sensitivity differs from that  
25       reported in other vertebrates, and allows adaptation to acoustically distinct  
26       environments throughout ontogeny. Our findings further elucidate the developmental  
27       patterns of the vertebrate auditory system.

28       **Keywords:** Auditory brainstem response; Developmental plasticity; Hearing  
29       sensitivity; *Trachemys scripta elegans*

30       **Running title:** Acoustic communication of turtle

31       **1. Introduction**

32       From insects to mammals, acoustic communication is crucial for survival,  
33       successful reproduction, and many other life-history strategies [1-3]. Usually, changes  
34       in the auditory system cause changes in sensitivity during ontogeny; these can have a

35 profound impact on an organism's hearing [4, 5]. Moreover, the development of  
36 hearing sensitivity allows accurate and efficient acoustic communication in  
37 individuals [4].

38 Developmental plasticity of hearing sensitivity has been verified in fishes [6, 7],  
39 frogs [8], lizards [9], birds [10, 11], mammals [12, 13], and humans [14], suggesting  
40 that auditory processing matures with age, and that this process differs between  
41 species. Turtles, like other amphibious animals, face a trade-off between terrestrial  
42 and aquatic hearing, and their acoustic environment changes during ontogeny; they  
43 may have evolved variability in hearing capacity to adapt to complex environments  
44 [15, 16]. Although there has been considerable research into auditory system  
45 development in some groups of vertebrates, much less is known about it in chelonians.  
46 At present, we know of only three studies on the developmental plasticity of hearing  
47 sensitivity in chelonians, and these reached different conclusions [17-19]. However,  
48 these studies had small samples ( $n < 7$ ), narrow age ranges, and unclear sexual  
49 categorization, factors that may affect their findings. Our previous study provided the  
50 first evidence that sexually dimorphic hearing sensitivity has evolved in turtles, with  
51 the hearing of females shows greater sensitivity [20]. It is necessary to further study  
52 ontogenetic changes in hearing sensitivity in chelonians.

53 Red-eared slider (*Trachemys scripta elegans*) is a semi-aquatic freshwater turtle,  
54 well adapted to living in various habitats, including rivers, streams, and even brackish  
55 water (Salinity 5.3–14.6‰) [21]. *Trachemys scripta elegans* is an important and  
56 potentially powerful model for researching hearing. Aspects of hearing, including the  
57 general ultrastructure of the auditory receptors (auditory hair cells) [22], the  
58 functional morphology of cochlear hair cell stereociliary bundles [23], the structure of  
59 the sound receiver organ (the tympanic disc) [15], habitat-related auditory plasticity  
60 [15], the response properties of auditory hair cell afferent fibers [24], the morphology  
61 of the middle-ear cavity [25], and sexually dimorphic hearing sensitivity [20], have  
62 been widely studied in this species. Those results provide an appropriate foundation  
63 and a reliable model organism to assess the developmental plasticity of hearing  
64 sensitivity in chelonians. Moreover, *T. scripta elegans* is farmed in many provinces of  
65 China; hence, sufficient numbers of experimental specimens were available.

66 Auditory brainstem response (ABR) measurement is a noninvasive and rapid  
67 method to measure hearing sensitivity; its use has been validated for frogs [26, 27],  
68 toads [28], and reptiles [18, 29]. Our aim was to demonstrate that aging is

69 accompanied by changes in turtle hearing sensitivity by measuring ABR, to assess  
70 ontogenetic changes in post-hatchling-to-reproductive *T. scripta elegans* adults. To do  
71 this, we focused on the hearing sensitivity bandwidth, threshold sensitivity, and  
72 latency.

73

## 74 **2. Materials and methods**

### 75 **2.1 Experimental animals**

76 Considering that sexually dimorphic hearing sensitivity has evolved in turtles, only  
77 female *T. scripta elegans* individuals were used. We used age groups of 1 week (n =  
78 10), 1 month (n = 11), 1 year (n = 10), and 5 years (n = 10). All animals were  
79 purchased from farms in Hainan Province, China, and maintained in standard aquaria  
80 at 20–25 °C until experiments were conducted. Body mass and carapace length are  
81 shown in Figure 1. Because we could not determine sex using external morphology,  
82 sex was determined by paraffin section of toe phalanges of 1-week and 1-month old  
83 individuals. Ages of individuals < 1 year old were determined by time since hatching.  
84 Ages of 5-year-old individuals were determined after the experiments by observing  
85 paraffin sections. Prior to electrode placement, each turtle was deeply anesthetized  
86 using a solution of 0.5% pelltobarbitalum natricum (CAS No.: 57-33-0, Xiya  
87 Reagents, Shandong, China) dissolved in 0.9% sodium chloride. The anesthetic was  
88 administered via hind limb intramuscular injection at an initial dose of 0.003 mL g<sup>-1</sup>.  
89 Additional doses (each at 20% of the initial dose) were administered in cases when  
90 the subject was not deeply anesthetized [20]. The electrophysiological experiments  
91 began after the subject showed no pain response to stimulating the hind leg muscles  
92 with forceps.

### 93 **2.2 ABR measurements**

#### 94 **2.2.1 ABR procedures**

95 ABR recordings of approximately 100 min were made using a TDT RZ6 Multi-I/O  
96 Processor, linked via fiber optic cables to a Tucker-Davis Technologies (TDT) RA4LI  
97 low-impedance digital headstage and RA4PA Medusa preamp; and analyzed using  
98 BioSig and SigGen software (Tucker-Davis Technologies, Inc., FL, USA). A portable  
99 amplified field speaker (frequency response 55–20 000 Hz, JBL GT7-6, Harman  
100 International Industries, Inc., USA) was located in a sound-proof booth lined with  
101 echo-attenuating acoustic foam, linked via fiber optic cables to a TDT RZ6 Multi-I/O  
102 Processor. Standard platinum alloy subdermal needle electrodes (27 ga, 13 mm length,

103 Rochester Electro-Medical, Inc., Lutz, FL, USA) were inserted sub-dermally above  
104 the tympanum (recording electrode), on the top of the head under the frontal scale  
105 (reference electrode), and in the ipsilateral front leg (ground electrode), and the other  
106 end of each needle was connected to the TDT RA4LI low-impedance (<3 k $\Omega$ ) digital  
107 headstage.

### 108 **2.2.2 Stimulus generation and presentation**

109 Sound stimuli were generated using a TDT RZ6 Multi-I/O Processor, which  
110 directly drove the speaker, running TDT SigGen software. Each individual tone burst  
111 (9 ms duration, 2 ms rise/fall time, with a sample rate of 24 414 Hz and alternating  
112 polarity) was synthesized digitally from 0.2 kHz to 1.5 kHz in 100 Hz increments, and  
113 attenuated in 5 dB steps from 90 dB to 35 dB, and presented at a rate of 4/s. Clicks  
114 were 0.1 ms in duration with a 249 ms interstimulus interval, attenuated in 5 dB steps  
115 from 90 dB to 35 dB, and presented at a rate of 4/s. Each ABR wave represented the  
116 average response to 200 stimulus presentations. Signals from the electrodes were  
117 amplified (20 $\times$ ) and filtered (high pass: 30 Hz; low pass: 3 kHz; notch filtered: 50 Hz).  
118 Sound stimuli were replicated once.

### 119 **2.2.3 Calibration**

120 ABR stimulus levels were calibrated in the free field using a TDT RZ6 Multi-I/O  
121 Processor and BioSigRP (Tucker-Davis Technologies, Inc., Florida, USA), linked to a  
122 sensor signal conditioner (model 480C02, PCB Piezotronics, Inc., Depew, NY, USA)  
123 with a 1/4 inch microphone (model 426B03 PCB Piezotronics, Inc., Depew, NY, USA)  
124 positioned approximately at the tip of jaw of the turtle, but when the turtle was absent.  
125 The distance between the speaker and the microphone was approximately 5 cm. The  
126 speaker repeatedly played the signal at the same rate used while recording ABRs, and  
127 simultaneously recorded the microphone signal at a sampling rate of 24 414 Hz.

### 128 **2.2.4 ABR thresholds and latencies define**

129 The ABR thresholds and latencies were determined using visual inspection similar  
130 to that previously described [29]. The threshold measurement was defined as the  
131 stimulus level below which no repeatable responses could be recognized [30, 31]. In  
132 order to reduce artificial error, all turtle ABR thresholds were determined by the same  
133 experienced person. We assumed that the 80 dB level was above the ABR threshold of  
134 all turtles studied, for the stimuli used.

### 135 **2.3 Morphological data measured**

136 Before ABR recordings, the body mass of all specimens was recorded by an

137 electronic balance (SI-234, Denver Instrument (Beijing) Co., Ltd.), while carapace  
138 length was measured using a Mitutoyo digital caliper (500-196-30, Mitutoyo Corp.,  
139 Japan).

#### 140 **2.4 Data analysis and statistics**

141 ABR morphologies, sensitivity thresholds, and latencies obtained from female *T.*  
142 *scripta elegans* in response to tone and click stimuli were sorted and analyzed using  
143 IBM SPSS 22.0 (IBM Corp., Chicago, IL, USA). Data on body mass and carapace  
144 length of different age groups were analyzed using one-way ANOVA followed by  
145 Tukey multiple comparison testing. General linear model multivariate analysis  
146 following by Tukey multiple comparison testing was used to determine the  
147 significance of differences in ABR thresholds and latencies among age groups at each  
148 stimulus frequency. Results are expressed as mean  $\pm$  SD, and  $P < 0.05$  was considered  
149 to reflect statistically significant difference.

### 150 **3. Results**

#### 151 **3.1 Morphological characteristics**

152

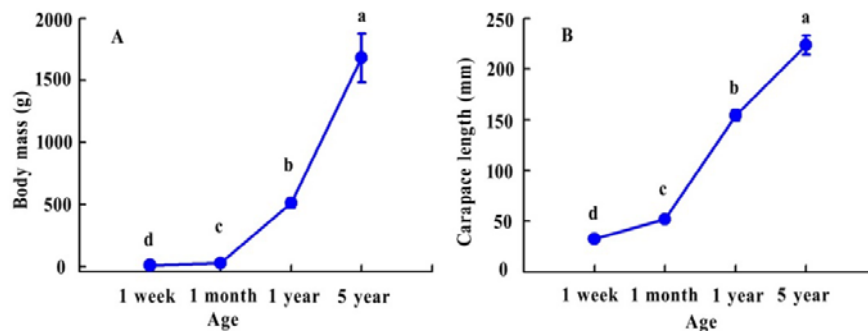

153

154 Figure 1. *Trachemys scripta elegans* body mass (A) and carapace length (B) varied  
155 with age. Points and error bars reflect the mean  $\pm$  SD.

156 Body mass was significantly influenced by age ( $F = 8119.45$ ,  $df = 3$ ,  $P < 0.001$ ),  
157 and differed significantly among age groups ( $P < 0.001$ ). Carapace length became  
158 significantly longer with age ( $F = 5816.28$ ,  $df = 3$ ,  $P < 0.001$ ), and differed  
159 significantly among age groups ( $P < 0.001$ ).

160

#### 161 **3.2 Hearing sensitivity bandwidth and ABR thresholds**

162 The hearing sensitivity bandwidths were 200–1100 Hz, 200–1100 Hz, 200–1300  
163 Hz, and 200–1400 Hz in the 1-week, 1-month, 1-year, and 5-year age groups,  
164 respectively (Fig. 2A). The greatest sensitivity frequency was about 200–900 Hz,

165 and the lowest sensitivity measured was at about 600 Hz (Fig. 2A).

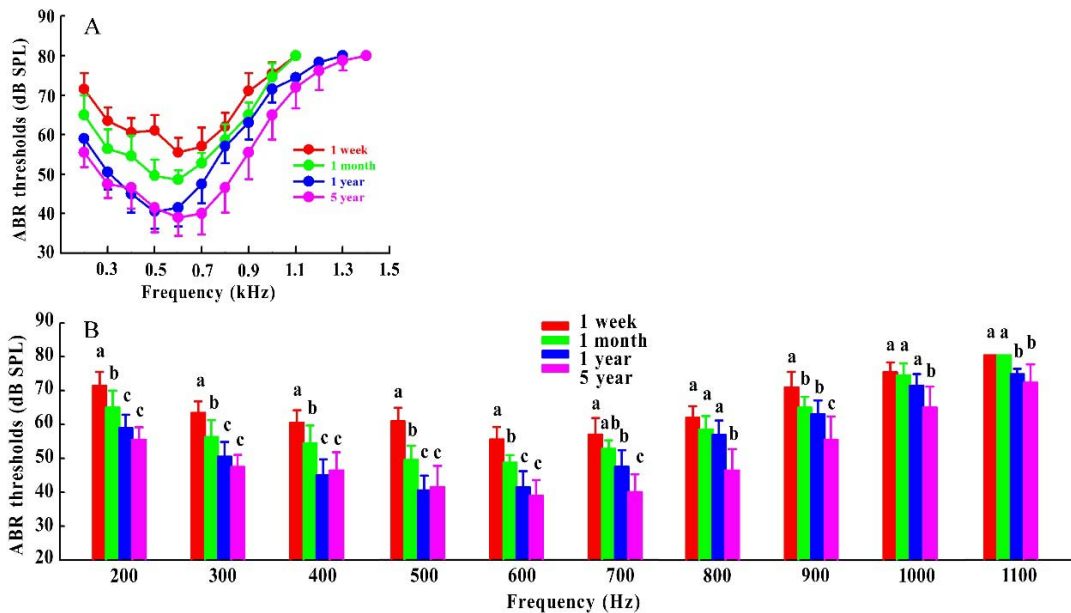

166

167 Figure 2. ABR threshold varied with stimulus frequency and age group in *Trachemys*  
168 *scripta elegans* (A); ABR threshold by stimulus frequency and age group in *T. scripta*  
169 *elegans* (B).

170 Below 600 Hz, the ABR threshold decreased rapidly with increasing age (1 week to  
171 1 year), with significant differences among age groups, but no significant difference  
172 between the 1- and 5-year age groups, for which the stimulus frequency ranged from  
173 200 Hz to 600 Hz (Fig. 2B). Above 600 Hz, the ABR threshold was significantly  
174 lower in the 5-year age group than in other groups (Fig. 2B).

175

### 176 3.3 ABR latency

177 The ABR latency for tone bursts at 75 dB was <5 ms in all age groups (Fig. 3A).

178 The ABR latency for tone bursts was lowest in the 5-year age group (Fig. 3B).

179

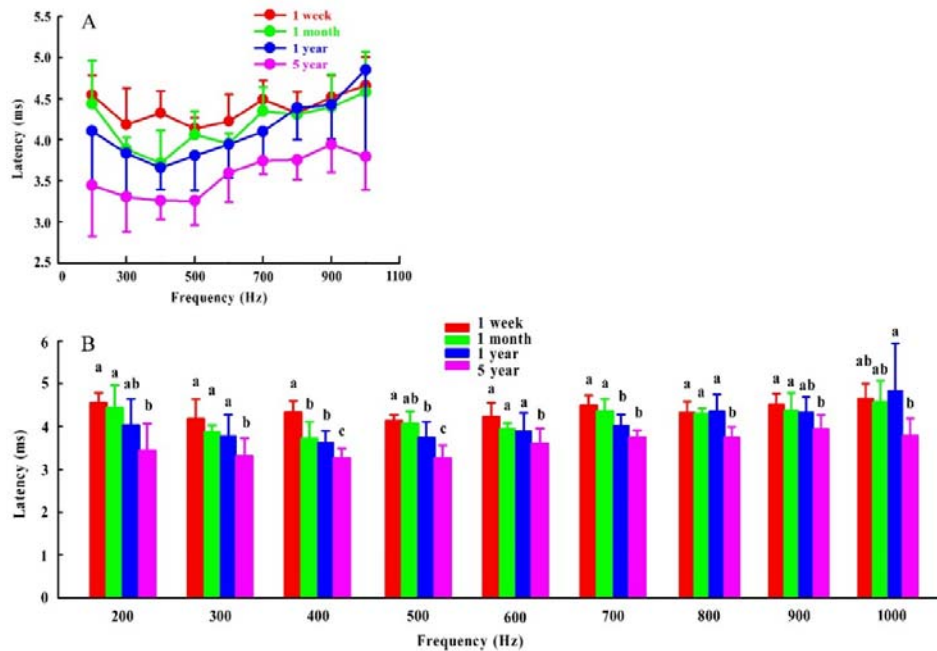

180

181 Figure 3. Latency against tone-burst frequency at 75 dB, by age group, in *Trachemys*  
182 *scripta elegans* (A); Latency by stimulus frequency and age group in *T. scripta*  
183 *elegans* (B).

184

#### 185 4. Discussion

186 Herpetologists have long considered turtles and tortoises to be “the silent group”,  
187 neither vocalizing nor hearing particularly well [32, 33]. However, the hearing  
188 sensitivity of chelonians has recently begun to attract attention, and behavioral and  
189 electrophysiological studies have revealed that turtles and tortoises are low-frequency  
190 specialists (usually <1000 Hz) [16, 34, 35]. We found that the turtles could not hear  
191 frequencies >1400 Hz, and that the upper limit of the hearing sensitivity bandwidth  
192 shifted higher during ontogeny.

193 Although habitat-related auditory plasticity has been reported for *T. scripta elegans*  
194 [15], little is known about the development of the auditory system in this group. To  
195 our knowledge, ours is the first study to demonstrate developmental plasticity of  
196 peripheral hearing sensitivity from the post-hatchling to reproductive adult stage in  
197 chelonians. We found that the ABR threshold was significantly lower in the 1-week to  
198 1-year age groups than in the 5-year age group. Remarkably, frequency sensitivity  
199 was developmentally segmented by 600 Hz: below this, the ABR threshold did not  
200 differ among the 1- to 5-year age groups; above this, it was significantly lower in the  
201 1-year than 5-year age group. We thus conclude that ontogenetic hearing sensitivity

202 development is rapid and frequency-segmented in *T. scripta elegans*. Our findings  
203 differ somewhat from those reported elsewhere. For instance, 3-year-old Hawksbill  
204 turtles (*Eretmochelys imbricata*) were sensitive to a wider frequency range and  
205 exhibited a larger amplitude response than the 2-year-olds [18]; loggerhead sea turtles  
206 (*Caretta caretta*) exhibited little difference in threshold sensitivity and frequency  
207 bandwidth throughout ontogeny [19]; and in subadult Green turtles (*Chelonia mydas*),  
208 smaller individuals had a wider hearing sensitivity bandwidth (100–800 Hz) than  
209 larger individuals (100–500 Hz) [17]. Our study improves on earlier studies,  
210 potentially providing more reliable results, because we used a larger age range, and,  
211 more importantly, we first determined the sex of individuals.

212 In the Bicolor damselfish (*Pomacentrus partitus*) the auditory thresholds decrease  
213 exponentially with increasing age, rapidly approaching adult levels [36]. Hearing  
214 sensitivity changes only slightly during growth of the Lusitanian toadfish  
215 (*Halobatrachus didactylus*) [37]. In budgerigars (*Melopsittacus undulatus*), hearing is  
216 poor at hatching, and thresholds improve markedly in the first week; by 1 week before  
217 fledging, ABR audiograms of young budgerigars are very similar to those of adult  
218 birds [11]. In some mammals, hearing sensitivity is weak at birth and gradually  
219 develops during the first weeks of life [38, 39], although other species, such as  
220 *Phyllostomus discolor* bats [13] and humans [40], have a well-developed auditory  
221 system at birth and even before birth. Our findings for *T. scripta elegans*, which  
222 include hysteresis in ontogenetic auditory development, therefore differ from those  
223 reported in other vertebrates. Our results further suggest that the time required to  
224 achieve a final level of auditory maturation varies among species.

225 Three possible mechanisms of developmental plasticity of peripheral hearing  
226 sensitivity in vertebrates have been reported. First, in frogs, the size of the tympanic  
227 membrane may be linked to differences in hearing sensitivity [41], and in some  
228 species of lizards, increased body size (or age) is accompanied by functional changes  
229 in the auditory periphery [9]. For *T. scripta elegans*, the tympanic disc is the key  
230 sound receiver [15]. However, we have found that the size of the tympanic membrane  
231 is not related to sexual dimorphism in hearing sensitivity in turtles [20]; thus, growth  
232 of the tympanic membrane during ontogeny may not explain the developmental  
233 plasticity of hearing sensitivity that we report herein. Second, age-related changes in  
234 middle-ear sound conduction occur [9]; once the structural development of the middle  
235 ear is complete, adult-like sound conduction is exhibited [9, 42-44]. Research into



236 habitat-related plasticity of hearing sensitivity has shown that *T. scripta elegans* is  
237 more sensitive to sound underwater than in the air, and that this is related to the large  
238 size of the middle ear [15]. Consequently, age-related changes in middle-ear sound  
239 conduction may also contribute to age-related alterations in threshold sensitivity in *T.*  
240 *scripta elegans*. Third, the sensory epithelium of the cochlear receptor organ may  
241 increase in size throughout life. In frogs and fishes, the area of auditory receptor  
242 epithelium increases with age, and cochlear growth is accompanied by an increase in  
243 the number of hair cells on the sensory surface [9, 45-47]. This suggests that the  
244 number of hair cells is related to developmental plasticity of hearing sensitivity in *T.*  
245 *scripta elegans*. Future morphological and anatomical research should address these  
246 questions.

247 Adult female turtles spend more time on land during the reproductive period, when  
248 laying and incubating; their improved hearing may enable them to adapt to the  
249 complex terrestrial environment. Hence, the rapid and frequency-segmented  
250 development of the chelonian auditory system during ontogeny reflects adaptation to  
251 acoustically distinct environments, and prepares the adults for reproduction.

252 In conclusion, we found that there was rapid and frequency-segmented  
253 development of the auditory system during ontogeny in *T. scripta elegans*. This differs  
254 from what has been reported for other vertebrates. Our findings provide greater clarity  
255 on the patterns of development of the vertebrate auditory system. It is still unknown  
256 whether age-related changes in middle-ear structures and in the auditory receptor  
257 epithelium lead to developmental plasticity of peripheral hearing sensitivity in this  
258 species. Further, as sexually dimorphic hearing sensitivity has been found in turtles, it  
259 is worth investigating whether they also exhibit sexual dimorphism in developmental  
260 plasticity of hearing sensitivity. Future morphological and anatomical studies should  
261 address these questions.

262

### 263 **Acknowledgements**

264 We would like to thank Yao Sun, Chunhua Zhou, and Xintong Li for their  
265 assistance during the study.

### 266 **Competing interests**

267 The authors declare that there are no competing interests.

### 268 **Funding**

269 This work was supported by the National Natural Science Foundation of China

270 (31860608 Wang JC); and Innovative Research Projects for Postgraduate Students in  
271 Hainan Province (Hyb2019-33 Wang TL).

272

## 273 **References**

274 1. Gerhardt HC, Huber F. 2002 Acoustic communication in insects and frogs:  
275 Common problems and diverse solutions. Chicago: University of Chicago Press.

276 2. Köppl C, Manley GA, Popper AN, Fay RR. 2014 Insights from comparative  
277 hearing research. New York: Springer.

278 3. Suthers RA, Fitch WT, Fay RR, Popper AN. 2016 Vertebrate Sound Production and  
279 Acoustic Communication. Heidelberg: Springer.

280 4. Werner L., Fay R.R., Popper A.N. 2011 Human auditory development. Springer  
281 Science & Business Media.

282 5. Rubel EW, Popper AN, Fay RR (eds). 2012. Development of the auditory system.  
283 Springer Science & Business Media.

284 6. Wysocki LE, Ladich F. 2001 The ontogenetic development of auditory sensitivity,  
285 vocalization and acoustic communication in the labyrinth fish *Trichopsis vittata*. *J*  
286 *Comp Physiol A* **187**(3), 177-187. (doi:10.1007/s003590100186).

287 7. Higgs D. 2002 Development of the fish auditory system: How do changes in  
288 auditory structure affect function. *Bioacoustics* **12**, 180-183. (doi:  
289 10.1080/09524622.2002.9753688).

290 8. Boatright-Horowitz SS, Simmons AM. 1995 Postmetamorphic changes in auditory  
291 sensitivity of the bullfrog midbrain. *J Comp Physiol A* **177**(5), 577-590. (doi:  
292 10.1007/BF00207187).

293 9. Werner YL, Montgomery LG, Safford SD, Iqic PG, Saunders JC. 1998 How body  
294 size affects middle-ear structure and function and auditory sensitivity in Gekkonoid  
295 lizards. *J Exp Biol* **201**(4), 487-502.

296 10. Aleksandrov LI, Dmitrieva LP. 1992 Development of auditory sensitivity of  
297 altricial birds: absolute thresholds of the generation of evoked potentials. *Neurosci*  
298 *Behav Physiol* **22**(2), 132-137. (doi:10.1007/BF01192385).

299 11. Brittan-Powell EF, Dooling RJ. 2004 Development of auditory sensitivity in

- 300 budgerigars (*Melopsittacus undulatus*). *J Acoust Soc Am* **115**(6), 3092-3102. (doi:  
301 10.1121/1.1739479).
- 302 12. RübSamen R, Neuweiler G, Marimuthu G. 1989 Ontogenesis of tonotopy in  
303 inferior colliculus of a hipposiderid bat reveals postnatal shift in frequency-place code.  
304 *J Comp Physiol A* **165**(6), 755-769. (doi:10.1007/BF00610874).
- 305 13. Linnenschmidt M, Wiegrebe L. 2019 Ontogeny of auditory brainstem responses in  
306 the bat, *Phyllostomus discolor*. *Hear Res* **373**, 85-95. (doi:  
307 10.1016/j.heares.2018.12.010).
- 308 14. Johnson KL, Nicol T, Zecker SG, Kraus N. 2008 Developmental plasticity in the  
309 human auditory brainstem. *J Neurosci* **28**(15), 4000-4007. (doi:  
310 10.1523/JNEUROSCI.0012-08.2008).
- 311 15. Christensen-Dalsgaard J, Brandt C, Willis KL, Christensen CB, Ketten D,  
312 Edds-Walton P, Fay RR, Madsen PT, Carr CE. 2012 Specialization for underwater  
313 hearing by the tympanic middle ear of the turtle, *Trachemys scripta elegans*. *P Roy*  
314 *Soc B* **279**(1739), 2816-2824. (doi: 10.1098/rspb.2012.0290).
- 315 16. Martin KJ, Alessi SC, Gaspard JC, Tucker AD, Bauer GB, Mann DA. 2012  
316 Underwater hearing in the Loggerhead turtle (*Caretta caretta*): a comparison of  
317 behavioral and auditory evoked potential audiograms. *J Exp Biol* **215**(17), 3001-3009.  
318 (doi: 10.1242/jeb.066324).
- 319 17. Bartol SM, Ketten DR. 2006 Turtle and tuna hearing, pp. 98-103.  
320 NOAA-NMFS-PIFSC. Washington, DC: US Department of Commerce.
- 321 18. Yudhana A, Din J, Abdullah S, Hassan RBR. 2010 Turtle hearing capability based  
322 on ABR signal assessment. *Telkomnika* **8**(2), 187-194.  
323 (doi:10.12928/telkomnika.v8i2.620).
- 324 19. Lavender AL, Bartol SM, Bartol IK. 2014 Ontogenetic investigation of  
325 underwater hearing capabilities in loggerhead sea turtles (*Caretta caretta*) using a  
326 dual testing approach. *J Exp Biol* **217**(14), 2580-2589.
- 327 20. Wang TL, Li HD, Cui JG, Zhai XF, Shi HT, Wang JC. 2019 Auditory brainstem  
328 responses in the red-eared slider *Trachemys scripta elegans* (Testudoformes:  
329 Emydidae) reveal sexually dimorphic hearing sensitivity. *J Comp Physiol A*

330 (Accepted)

331 21. Ma K, Shi H. 2017 Red-eared slider *Trachemys scripta elegans* (Wied-Neuwied).

332 Biological Invasions and Its Management in China. Springer, Singapore, 2017: 49-76.

333 22. Sneary MG. 1988 Auditory receptor of the red-eared turtle: I. General

334 ultrastructure. *J Comp Neurol* **276**(4), 573-587. (doi:10.1002/cne.902760410).

335 23. Hackney CM, Fettiplace R, Furness DN. 1993 The functional morphology of

336 stereociliary bundles on turtle cochlear hair cells. *Hear Res* **69**(1), 163-175. (doi:

337 10.1016/0378-5955(93)90104-9).

338 24. Schnee ME, Castellano-Muñoz M, Ricci AJ. 2013 Response properties from turtle

339 auditory hair cell afferent fibers suggest spike generation is driven by synchronized

340 release both between and within synapses. *J Neurophysiol* **110**, 204-220.

341 (doi:10.1152/jn.00121.2013).

342 25. Willis KL, Christensen-Dalsgaard J, Ketten DR, Carr CE. 2013 Middle ear cavity

343 morphology is consistent with an aquatic origin for testudines. *Plos One* **8**(1), e54086.

344 26. Wang JC, Wang TL, Fu SH, Brauth SE, Cui JG. 2016 Auditory brainstem

345 responses in the Chinese tiger frog *Hoplobatrachus chinensis* (Osbeck, 1765) (Anura:

346 Dicroglossidae) reveal sexually dimorphic hearing sensitivity. *Ital J Zool* **83**(4),

347 482-489. (doi:10.1080/11250003.2016.1222638).

348 27. Cui J, Zhu B, Fang G, Smith E, Brauth SE, Tang Y. 2017 Effect of the level of

349 anesthesia on the auditory brainstem response in the Emei music frog (*Babina*

350 *daunchina*). *Plos One* **12**(1), e0169449.

351 28. Wang T, Jia L, Zhai X, Cui J, Wang J. 2019 The vocalizations and hearing

352 sensitivity of an explosive-breeding tropical toad from southern China: A test of the

353 matched filter hypothesis. *Pak J Zool* **51**(2), 737-745. (doi:

354 10.17582/journal.pjz/2019.51.2.737.745).

355 29. Brittan-Powell EF, Christensen-Dalsgaard J, Tang Y, Carr C, Dooling RJ. 2010

356 The auditory brainstem response in two lizard species. *J Acoust Soc Am* **128**(2),

357 787-794. (doi: 10.1121/1.3458813).

358 30. Bierman HS, Thornton JL, Jones HG, Koka K, Young BA, Brandt C,

359 Christensen-Dalsgaard J, Carr CE, Tollin DJ. 2014 Biophysics of directional hearing

- 360 in the American alligator (*Alligator mississippiensis*). *J Exp Biol*, **217**(7):1094-1107.  
361 (doi: 10.1242/jeb.092866).
- 362 31. Scott LL, Brecht EJ, Philpo A, Iyer S, Wu NS, Mihic SJ, Aldrich RW, Pierce J,  
363 Walton JP. 2017 A novel BK channel-targeted peptide suppresses sound evoked  
364 activity in the mouse inferior colliculus. *Sci Rep* **7**, 42433. (doi: 10.1038/srep42433).
- 365 32. Pope CH. 1955 The Reptile World. New York: Knopf.
- 366 33. Campbell HW, Evans WE. 1972 Observations on the vocal behavior of chelonians.  
367 *Herpetol*, **28**(3):277-280.
- 368 34. Bartol SM, Musick JA, Lenhardt ML. 1999 Auditory evoked potentials of the  
369 Loggerhead sea turtle (*Caretta caretta*). *Copeia*, **1999**(3):836-840. (doi:  
370 10.2307/1447625).
- 371 35. Ferrara C.R., Vogt R.C., Giles J.C., Kuchling G. 2014 Chelonian Vocal  
372 Communication. *Biocommunication of Animals*. Springer, Dordrecht, 2014: 261-274.
- 373 36. Kenyon TN. 1996 Ontogenetic changes in the auditory sensitivity of damselfishes  
374 (Pomacentridae). *J Comp Physiol A* **179**(4), 553-561. (doi: 10.1007/BF00192321).
- 375 37. Vasconcelos RO, Friedrich L. 2008 Development of vocalization, auditory  
376 sensitivity and acoustic communication in the Lusitanian toadfish *Halobatrachus*  
377 *didactylus*. *J Exp Biol* **211**(4), 502-509. (doi: 10.1242/jeb.008474).
- 378 38. Brown PE, Grinnell AD, Harrison JB. 1978 The development of hearing in the  
379 pallid bat, *Antrozous pallidus*. *J Comp Physiol* **126**(2), 169-182. (DOI:  
380 10.1007/BF00666371).
- 381 39. Brown PE, Grinnell AD. 1980 Echolocation Ontogeny in Bats. Plenum, New York.
- 382 40. Birnholz JC, Benacerraf BR. 1983 The development of human fetal hearing.  
383 *Science* **222**(4623), 516-518. (doi: 10.1126/science.6623091).
- 384 41. Feng AS, Narins PM, Xu CH, Lin WY, Yu ZL, Qiu Q, Xu ZM, Shen JX. 2006  
385 Ultrasonic communication in frogs. *Nature* **440**(7082), 333-336. (doi:  
386 10.1038/nature04416).
- 387 42. Cohen YE, Rubin DM, Saunders JC. 1992 Middle ear development. I:  
388 Extra-stapedius response in the neonatal chick. *Hear Res* **58**(1), 1-8. (doi:  
389 10.1016/0378-5955(92)90002-5).

- 390 43. Doan DE, Cohen YE, Saunders JC. 1994 Middle-ear development. IV. Umbo  
391 motion in neonatal mice. *J Comp Physiol A* **174**(1), 103-110. (doi:  
392 10.1007/BF00192011).
- 393 44. Doan DE, Igic PG, Saunders JC. 1996 Middle ear development. VII: Umbo  
394 velocity in the neonatal rat. *J Acoust Soc Am* **99**, 1566–1572. (doi: 10.1121/1.415235).
- 395 45. Li CW, Lewis ER. 1974 Morphogenesis of auditory receptor epithelia in the  
396 bullfrog. *Scann Electron Microsc* **3**, 791-798.
- 397 46. Popper AN, Hoxter B. 1984 Growth of a fish ear: 1. Quantitative analysis of hair  
398 cell and ganglion cell proliferation. *Hear Res* **15**(2), 133-142. (doi:  
399 10.1016/0378-5955(84)90044-3).
- 400 47. Wang J, Song Q, Yu D, Yang G, Xia L, Su K, Shi H, Wang J, Yin S. 2015  
401 Ontogenetic development of the auditory sensory organ in zebrafish (*Danio rerio*):  
402 changes in hearing sensitivity and related morphology. *Sci Rep* **5**, 15943. (doi:  
403 10.1038/srep15943).
